# Supplementary material for: Dehydroeburicoic Acid, a Dual Inhibitor against Oxidative Stress in Alcoholic Liver Disease
Source: MDPI journal article supplement (doi:10.3390/ph16010014), 2022-12-22
Supplement: s1 [file s1]

## Supplementary information

### Dehydroeburicoic Acid, a Dual Inhibitor against Oxidative Stress in Alcoholic Liver Disease

Shasha Cheng <sup>1,†</sup>, Yi Kuang <sup>2,†</sup>, Guodong Li <sup>1,3</sup>, Jia Wu <sup>1</sup>, Chung-Nga Ko <sup>4</sup>, Wanhe Wang <sup>4,5</sup>,  
Dik-Lung Ma <sup>4,\*</sup>, Min Ye <sup>2,\*</sup> and Chung-Hang Leung <sup>1,3,6,\*</sup>

<sup>1</sup> State Key Laboratory of Quality Research in Chinese Medicine, Institute of Chinese Medical Sciences, University of Macau, Macau SAR 999078, China

<sup>2</sup> State Key Laboratory of Natural and Biomimetic Drugs, School of Pharmaceutical Sciences, Peking University, Beijing 100191, China

<sup>3</sup> Zhuhai UM Science and Technology Research Institute, Zhuhai 519031, China

<sup>4</sup> Department of Chemistry, Hong Kong Baptist University, Hong Kong SAR 999077, China

<sup>5</sup> Institute of Medical Research, Northwestern Polytechnical University, Xi'an 710072, China

<sup>6</sup> Department of Biomedical Sciences, Faculty of Health Sciences, University of Macau, Macau SAR 999078, China

\* Correspondence: edmondma@hkbu.edu.hk (D.-L.M.); yemin@bjmu.edu.cn (M.Y.); duncanleung@um.edu.mo (C.-H.L.)

† These authors contributed equally to this work.

# Table of Contents

|                                                                                                                                                                                |   |
|--------------------------------------------------------------------------------------------------------------------------------------------------------------------------------|---|
| Supplementary file S1 NMR data of dehydroeburicoic acid.....                                                                                                                   | 2 |
| Supplementary Figure S1. NMR spectra of dehydroeburicoic<br>a c i d ... ..                                                                                                     | 3 |
| Supplementary Figure S2. The time dependent of ML334, compound <b>2</b> , compound DEA ( <b>1</b> ) and<br>induces antioxidant factor expression in the ALD cell<br>model..... | 4 |
| Supplementary Table S1. Primer sequences used for PCR analysis.....                                                                                                            | 4 |

## Supplementary file S1

### NMR data of dehydroeburicoic acid

Dehydroeburicoic acid:  $^1\text{H}$  NMR (400 MHz, pyridine- $d_5$ )  $\delta$ : 3.46 (1H, t,  $J$  = 7.9 Hz, H-3), 5.63 (1H, s, H-7), 5.39 (1H, d,  $J$  = 5.1 Hz, H-11), 1.09 (3H, m, H-18), 1.09 (3H, m, H-19), 1.03 (6H, m, H-26, 27), 4.91 (1H, s, H-28a), 4.95 (1H, s, H-28b), 1.23 (3H, s, H-29), 1.15 (3H, m, H-30), 1.03 (3H, m, H-31).  $^{13}\text{C}$  NMR (100 MHz, pyridine- $d_5$ )  $\delta$ : 36.7 (C-1), 29.1 (C-2), 78.4 (C-3), 39.7 (C-4), 50.1 (C-5), 23.9 (C-6), 121.7 (C-7), 143.2 (C-8), 147.0 (C-9), 38.2 (C-10), 117.0 (C-11), 36.4 (C-12), 44.7 (C-13), 50.9 (C-14), 32.0 (C-15), 27.7 (C-16), 48.5 (C-17), 16.6 (C-18), 23.4 (C-19), 49.5 (C-20), 178.9 (C-21), 32.1 (C-22), 33.1 (C-23), 156.2 (C-24), 34.6 (C-25), 22.4 (C-26), 22.3 (C-27), 107.5 (C-28), 26.3 (C-29), 29.2 (C-30), 17.0 (C-31)

Supplementary file S2

Supplementary material Figure S1.  $^1\text{H}$  and  $^{13}\text{C}$  NMR spectra of dehydroeburicoic acid.

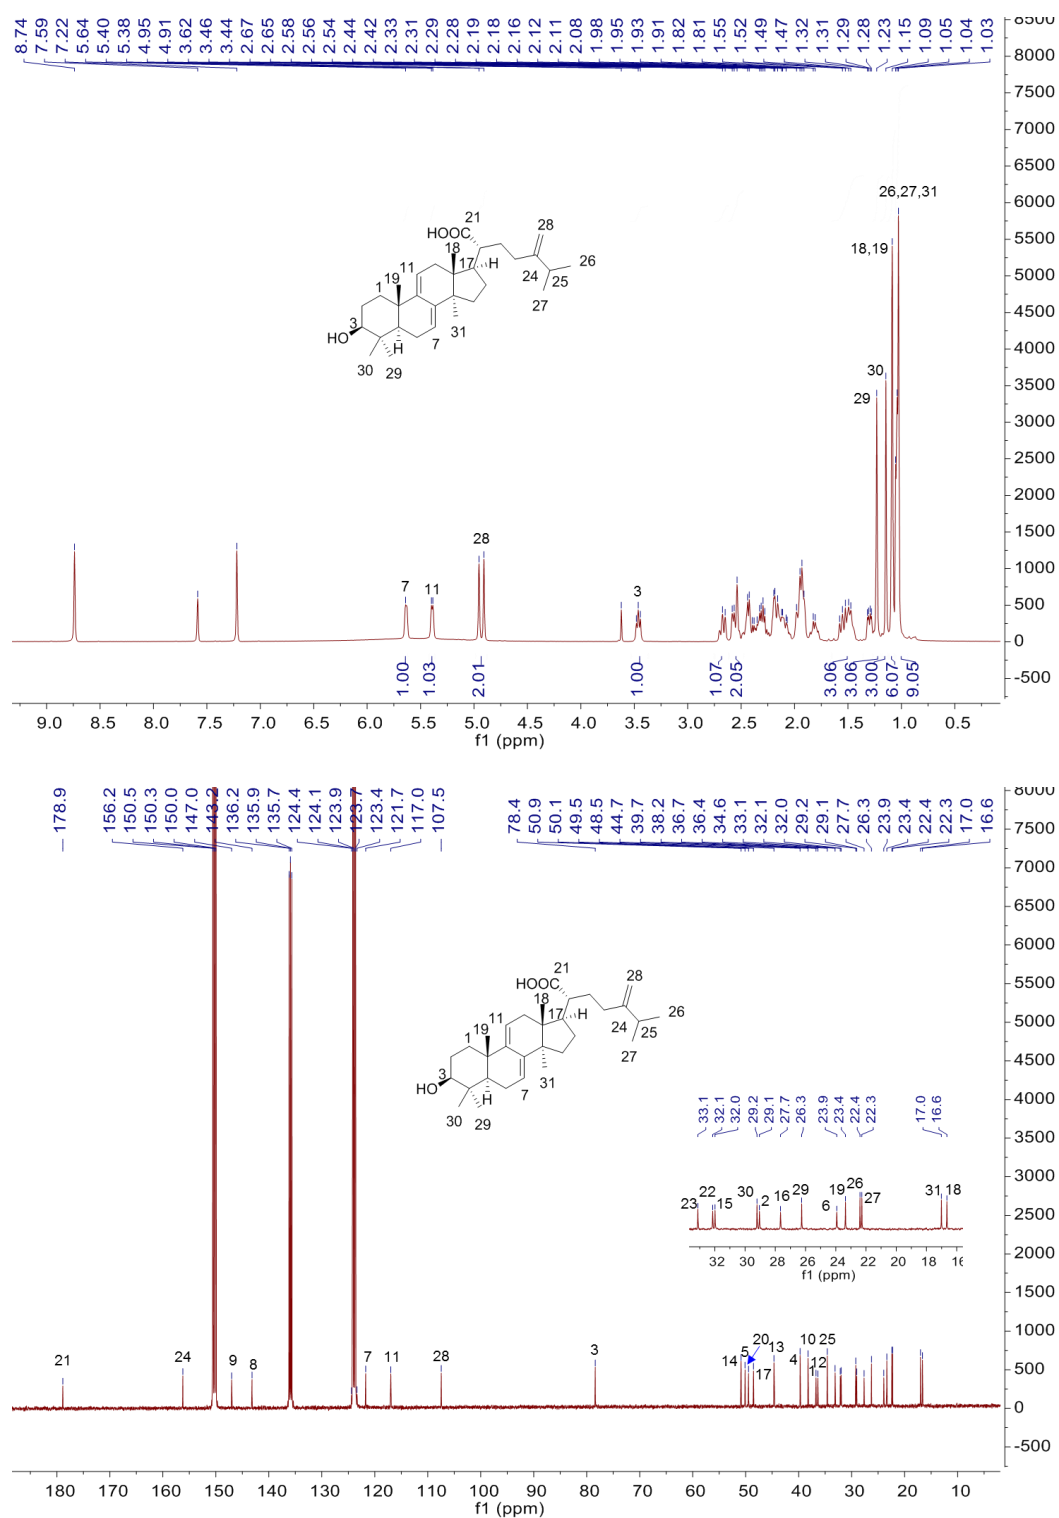

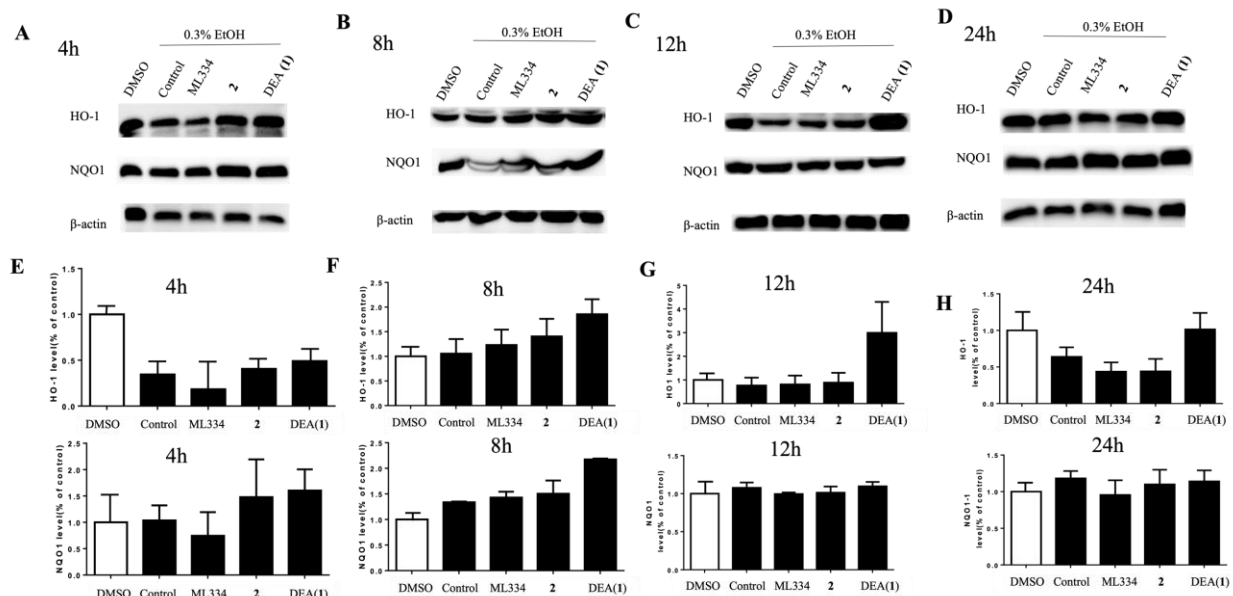

Supplementary Figure S2. The time dependent of ML334, compound **2**, and compound DEA (**1**) induces antioxidant factor expression in the ALD cell model. (A–D) Effects of 30  $\mu$ M ML334, 30  $\mu$ M of **2**, and DEA (**1**) on NQO1, HO–1 protein levels in LO2 cells after 4, 8, 12, 24 h treatment. (E–H) Quantification analysis of 4 h of HO–1 (upper) and NQO1 (lower) (E), 8 h of HO–1 (upper) and NQO1 (lower) (F), 12 h of HO–1 (upper) and NQO1 (lower) (G), 24 h of HO–1 (upper) and NQO1 (lower) (H) in WB.

### Supplementary file S3

### Supplementary material Table S1. Primer sequences used for PCR analysis.

| <b>RT-PCR primers</b>           | <b>Forward primer</b>    | <b>Reverse primer</b>    | <b>Accession number</b> | <b>Amplicon size</b> |
|---------------------------------|--------------------------|--------------------------|-------------------------|----------------------|
| <i><math>\beta</math>-actin</i> | 5'CATGTACGTTGCTATCCAGGC  | 5'CTCCTTAATGTCACGCACGAT  | AK225414                | 250                  |
| <i>NQO1</i>                     | 5'GAAGAGCACTGATCGTACTGGC | 5'GGATACTGAAAGTTCGCAGGG  | NG01150                 | 312                  |
|                                 |                          |                          | 4                       |                      |
| <i>H01</i>                      | 5'GCCCTTCAGCATCCTCAGTTC  | 5'GTTTGAGACAGCTGCCACAT   | NM002133                | 68                   |
| <i>SOD2</i>                     | 5'CGTGACTTTGGTTCCTTTGAC  | 5'ATTTGTAAGTGTCCTCCGTTCC | NG008729                | 116                  |
| <i>Nrf1</i>                     | 5'CCAAGTGAATTATTCTGCCG   | 5'TGACTGCGCTGTCTGATATCC  | KJ901609                | 494                  |
| <i>PGC-1<math>\alpha</math></i> | 5'-GTCACCACCCAAATCCTTAT  | 5'ATCTACTGCCTGGAGACCTT   | EU280319                | 131                  |
